# Supplementary material for: Prioritising Autoimmunity Risk Variants for Functional Analyses by Fine-Mapping Mutations Under Natural Selection
Source: bioRxiv preprint, doi:10.1101/2021.11.01.466789, version 1 (2021-11-04)
Supplement: Supplementary Figure 3 [file 466789_file04.pdf]

# Index SNP - chr2:rs1018326\*C - Celiac\_disease

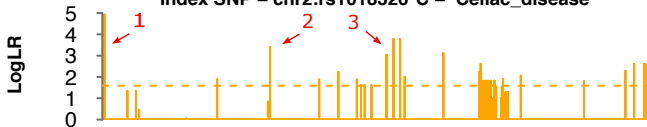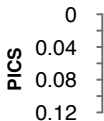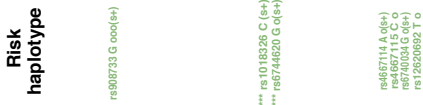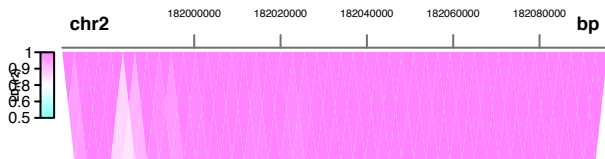

**Genes**

**Regulatory elements**

AC068196.1

AC104820.2

ENSR00001631789

ENSR00001631795

ENSR00001631789 ENSR00001631790 ENSR00001631791 ENSR00001631792 ENSR00001631793 ENSR00001631794 ENSR00001631795

ENSR00001631789 ENSR00001631790 ENSR00001631791 ENSR00001631792 ENSR00001631793 ENSR00001631794 ENSR00001631795

ENSR00001631789 ENSR00001631790 ENSR00001631791 ENSR00001631792 ENSR00001631793 ENSR00001631794 ENSR00001631795
