# Supplementary material for: Prioritising Autoimmunity Risk Variants for Functional Analyses by Fine-Mapping Mutations Under Natural Selection
Source: bioRxiv or medRxiv preprint supplement (doi:10.1101/2021.11.01.466789), 2021-11-04

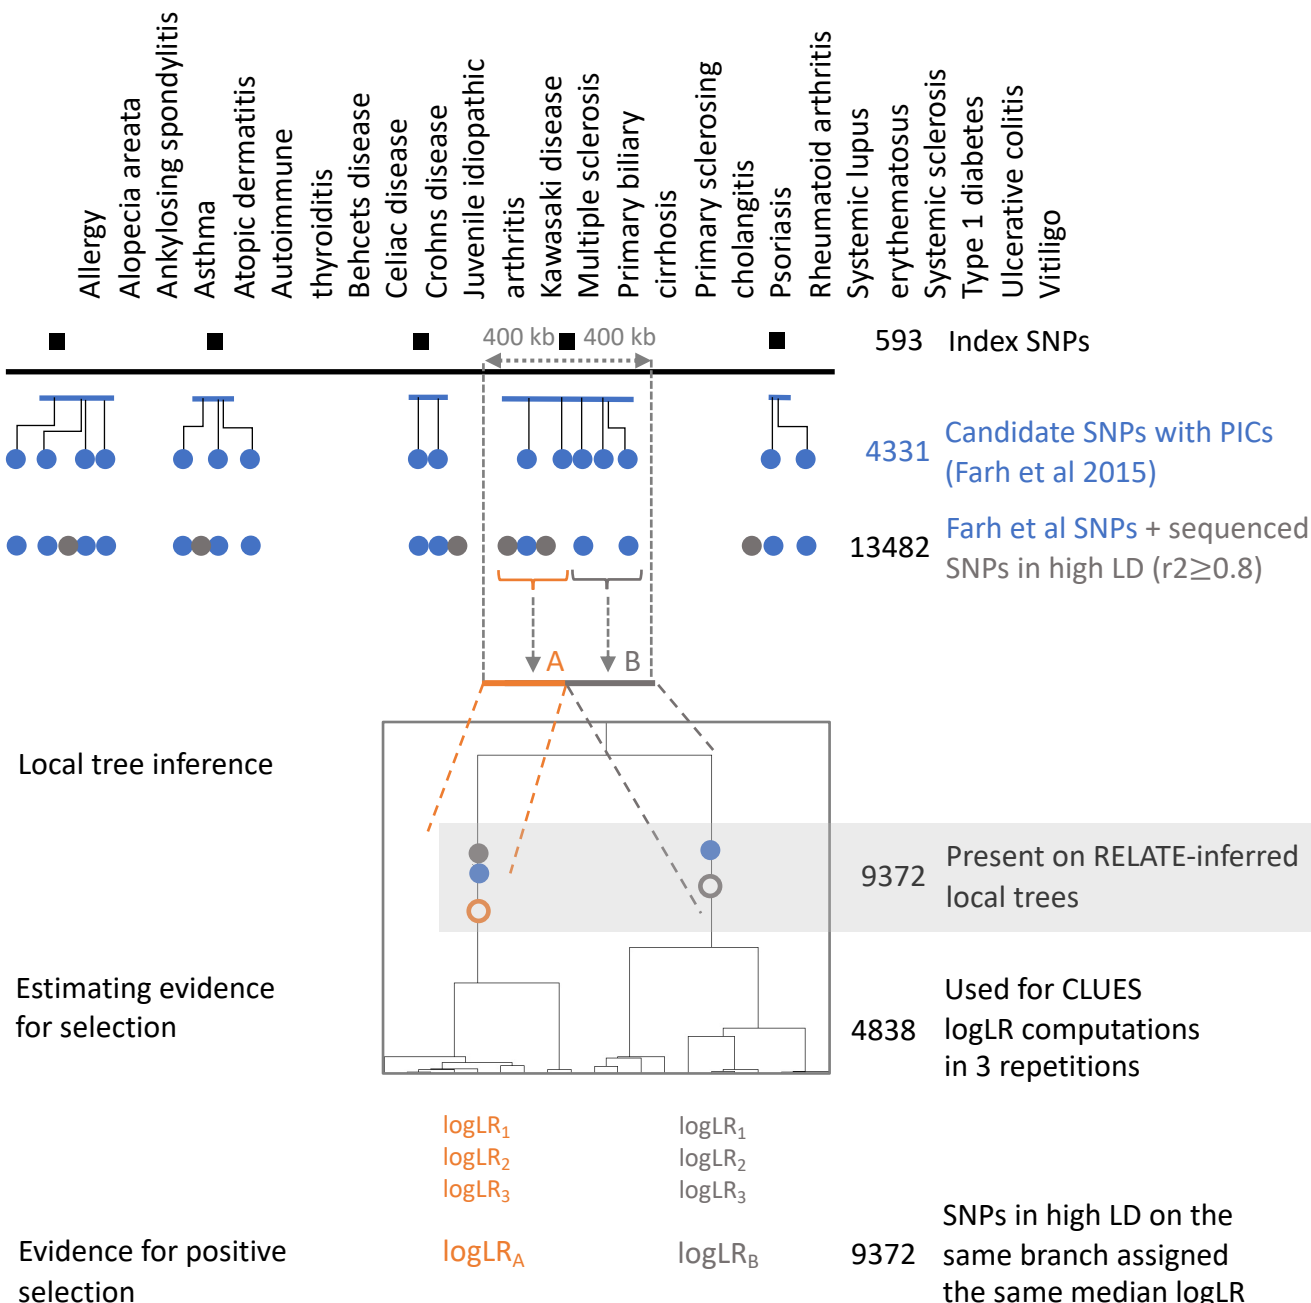

Supplement: Supplementary file [file media-1.pdf]
